# Supplementary material for: Barcoding Fauna Bavarica: 78% of the Neuropterida Fauna Barcoded!
Source: PubMed Central journal article supplement (PMC4186837; doi:10.1371/journal.pone.0109719), 2014-10-06

2%

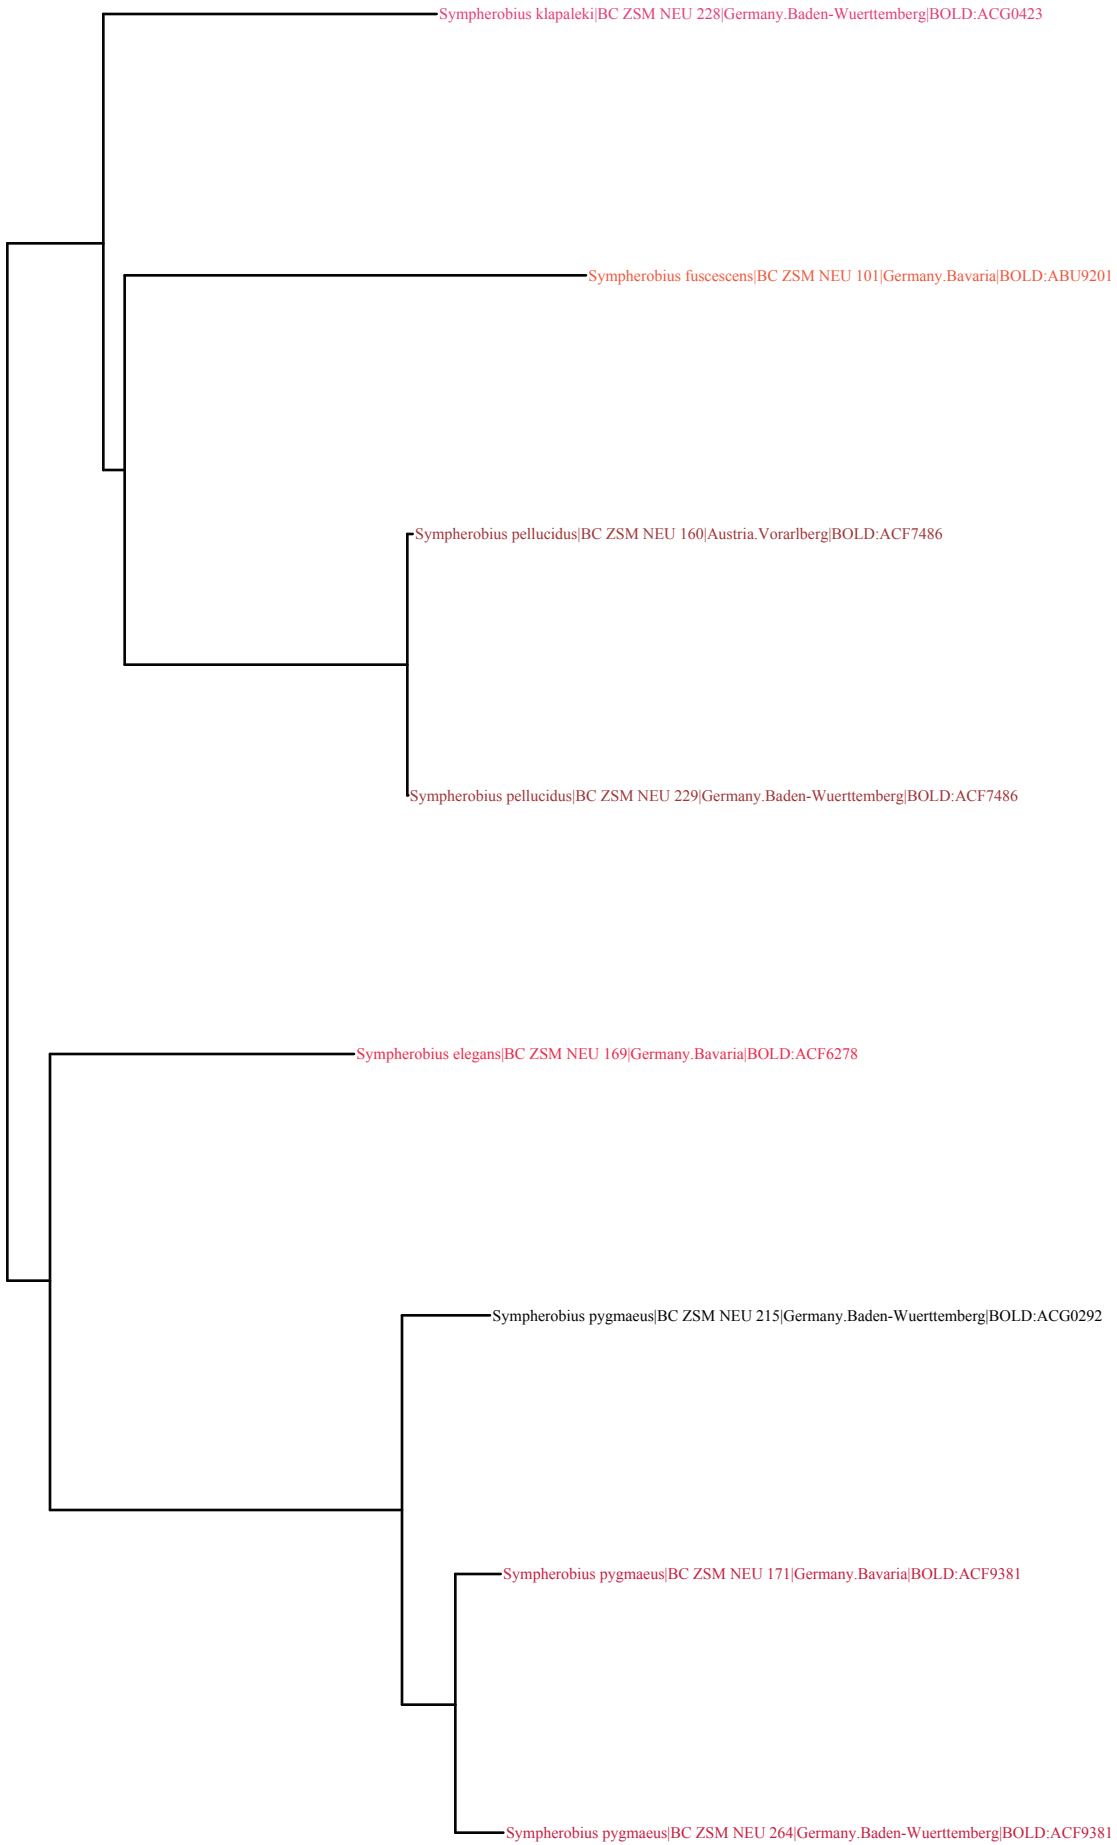

Supplement: pone.0109719.s002.pdf [file pone.0109719.s002.pdf]
